# Supplementary material
Source: PubMed Central journal article supplement (PMC5605444)
Supplement: NIHMS895272-supplement-1.pdf [file NIHMS895272-supplement-1.pdf]

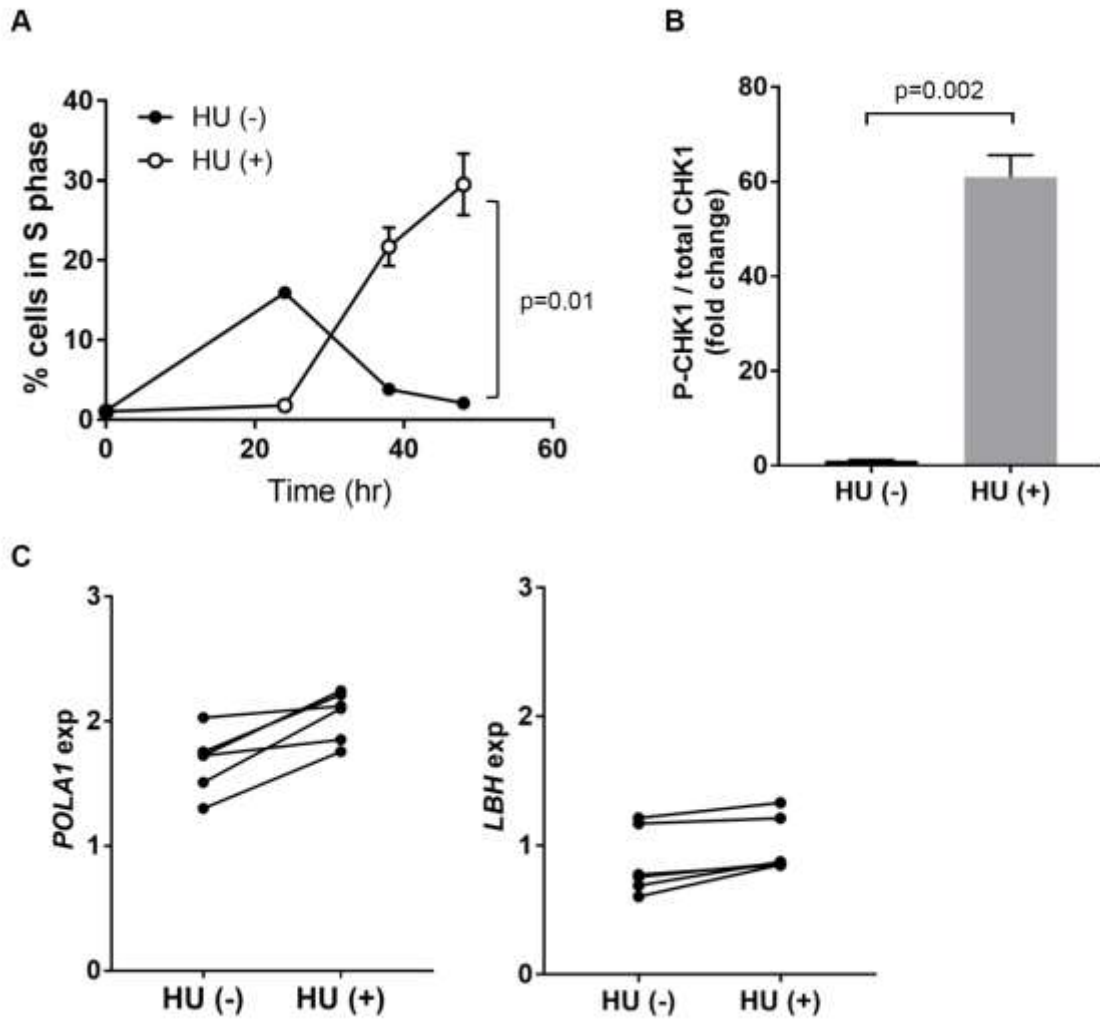

**Supplemental Figure 1. Effect of hydroxyurea (HU) on DNA polymerase expression**

RA FLS were serum starved for 2 days followed by 10% FBS with HU and flow cytometric analysis. (A) The percentage of cells in S phase, indicating averages of 3 different RA FLS lines. Data were analyzed using the 2-way ANOVA. (B) HU treatment increased CHK1 phosphorylation at Ser 345 in RA FLS, confirming S checkpoint activation. Values are the mean  $\pm$  SEM of 5 different FLS lines, assessed by Western blots. Data were analyzed using the 2-tailed paired t test. (C) There was no significant reduction in POLA1 or LBH expression in HU-treated FLS. Each symbol represents an individual sample; horizontal lines with bars show the mean. Data were analyzed using the 2-tailed paired t test.
